# Supplementary material for: eHealth Applications to Support Independent Living of Older Persons: Scoping Review of Costs and Benefits Identified in Economic Evaluations
Source: PubMed Central journal article supplement (PMC7988395; doi:10.2196/24363), 2021-03-09
Supplement: jmir_v23i3e24363_app1.pdf [file jmir_v23i3e24363_app1.pdf]

## APPENDIX 1

Search strategy

### **embase.com 1073**

('economic evaluation'/exp OR 'health economics'/de OR 'program cost effectiveness'/de OR (((econom\*) NEAR/3 (evaluat\* OR analys\* OR model\*)) OR (cost NEAR/3 (eval\* OR benefit\* OR effectiv\* OR utilit\* OR consequen\* OR minimi\* OR outcome\* OR reduc\* OR saving\* OR efficien\*)) OR (value NEAR/3 money) OR (willingness NEAR/3 pay) OR (business NEAR/3 model\*) OR (social NEAR/3 return NEAR/3 invest\*)):ab,ti) AND ('teleHealth'/exp OR videoconferencing/exp OR telemetry/exp OR (e-coach\* OR teleHealth OR telemonitor\* OR Telerehabilitation\* OR Telemedic\* OR Telehomecare\* OR telenursing OR telecard\* OR telesurg\* OR teledermato\* OR Telepsychiatr\* OR Teleconsult\* OR Teleradiolog\* OR Telecare\* OR teleecho\* OR Tele-toxico\* OR Teletoxico\* OR telepractice\* OR tele-practice\* OR telediagnos\* OR Telehome-care\* OR teleaudiolog\* OR telepatholog\* OR teleradiotherap\* OR eHealth OR e-health OR mhealth OR m-health OR videoconferencing OR videocommunicat\* OR ((mobile OR It) NEAR/3 (health OR solution\*)) OR telesurveil\* OR (remote NEAR/3 (monitor\* OR sens\*)) OR telemetr\* OR ((tele\* OR video OR e) NEXT/1 (psychiatr\* OR consult\* OR radiolog\* OR health OR monitor\* OR rehabilitation\* OR medic\* OR homecare\* OR nursing OR card\* OR surg\* OR dermat\* OR care\* OR home-care\* OR nursing OR echo\* OR diagnos\* OR audiolog\* OR patholog\* OR radiotherap\* OR surveillan\* OR conferencing OR communicat\* OR metr\* OR physiotherapy\*)) OR Wearable\*):ab,ti) AND ('home care'/exp OR 'independent living'/exp OR 'assisted living facility'/exp OR 'healthy aging'/exp OR 'community living'/de OR ('home care' OR homecare OR telehomecare OR home OR ((independent\* OR assisted OR communit\*) NEAR/3 (living)) OR ((healthy OR active) NEAR/3 (aging OR ageing)) OR domotic\*):Ab,ti) NOT ([Conference Abstract]/lim) AND [English]/lim

### **Medline Ovid 772**

(Cost-Benefit Analysis/ OR Economics, Medical/ OR (((econom\*) ADJ3 (evaluat\* OR analys\* OR model\*)) OR (cost ADJ3 (eval\* OR benefit\* OR effectiv\* OR utilit\* OR consequen\* OR minimi\* OR outcome\* OR reduc\* OR saving\* OR efficien\*)) OR (value ADJ3 money) OR (willingness ADJ3

pay) OR (business ADJ3 model\*) OR (social ADJ3 return ADJ3 invest\*).ab,ti.) AND (exp Telemedicine/ OR Videoconferencing/ OR Telemetry/ OR (e-coach\* OR teleHealth OR telemonitor\* OR Telerehabilitation\* OR Telemedic\* OR Telehomecare\* OR telenursing OR telecard\* OR telesurg\* OR teledermato\* OR Telepsychiatr\* OR Teleconsult\* OR Teleradiolog\* OR Telecare\* OR teleecho\* OR Tele-toxico\* OR Teletoxico\* OR telepractice\* OR tele-practice\* OR telediagnos\* OR Telehome-care\* OR teleaudiolog\* OR telepatholog\* OR teleradiotherap\* OR eHealth OR e-health OR mhealth OR m-health OR videoconferencing OR videocommunicat\* OR ((mobile OR It) ADJ3 (health OR solution\*)) OR telesurveil\* OR (remote ADJ3 (monitor\* OR sens\*)) OR telemetr\* OR ((tele\* OR video OR e) ADJ (psychiatr\* OR consult\* OR radiolog\* OR health OR monitor\* OR rehabilitation\* OR medic\* OR homecare\* OR nursing OR card\* OR surg\* OR dermat\* OR care\* OR home-care\* OR nursing OR echo\* OR diagnos\* OR audiolog\* OR patholog\* OR radiotherap\* OR surveillan\* OR conferencing OR communicat\* OR metr\* OR physiotherapy\*)) OR Wearable\*).ab,ti.) AND (exp Home Care Services/ OR Independent Living/ OR exp Assisted Living Facilities/ OR Healthy Aging/ OR (home care OR homecare OR telehomecare OR home OR ((independent\* OR assisted OR communit\*) ADJ3 (living)) OR ((healthy OR active) ADJ3 (aging OR ageing)) OR domotic\*).ab,ti.) NOT (news OR congres\* OR abstract\* OR book\* OR chapter\* OR dissertation abstract\*).pt. AND english.la.

**CINAHL EBSCOhost 505**

(MH Cost-Benefit Analysis OR TI (((econom\*) N2 (evaluat\* OR analys\* OR model\*)) OR (cost N2 (eval\* OR benefit\* OR effectiv\* OR utilit\* OR consequen\* OR minimi\* OR outcome\* OR reduc\* OR saving\* OR efficien\*)) OR (value N2 money) OR (willingness N2 pay) OR (business N2 model\*) OR (social N2 return N2 invest\*)) OR AB (((econom\*) N2 (evaluat\* OR analys\* OR model\*)) OR (cost N2 (eval\* OR benefit\* OR effectiv\* OR utilit\* OR consequen\* OR minimi\* OR outcome\* OR reduc\* OR saving\* OR efficien\*)) OR (value N2 money) OR (willingness N2 pay) OR (business N2 model\*) OR (social N2 return N2 invest\*))) AND (MH Telemedicine+ OR MH Videoconferencing OR MH Telemetry OR TI (e-coach\* OR teleHealth OR telemonitor\* OR Telerehabilitation\* OR Telemedic\* OR Telehomecare\* OR telenursing OR telecard\* OR telesurg\* OR teledermato\* OR Telepsychiatr\* OR Teleconsult\* OR Teleradiolog\* OR Telecare\* OR teleecho\* OR Tele-toxico\* OR Teletoxico\* OR telepractice\* OR tele-practice\* OR telediagnos\* OR Telehome-care\* OR

teleaudiolog\* OR telepatholog\* OR teleradiotherap\* OR eHealth OR e-health OR mhealth OR m-health OR videoconferencing OR videocommunicat\* OR ((mobile OR It) N2 (health OR solution\*)) OR telesurveil\* OR (remote N2 (monitor\* OR sens\*)) OR telemetr\* OR ((tele\* OR video OR e) N1 (psychiatr\* OR consult\* OR radiolog\* OR health OR monitor\* OR rehabilitation\* OR medic\* OR homecare\* OR nursing OR card\* OR surg\* OR dermat\* OR care\* OR home-care\* OR nursing OR echo\* OR diagnos\* OR audiolog\* OR patholog\* OR radiotherap\* OR surveillan\* OR conferencing OR communicat\* OR metr\* OR physiotherapy\*)) OR Wearable\*) OR AB (e-coach\* OR teleHealth OR telemonitor\* OR Telerehabilitation\* OR Telemedic\* OR Telehomecare\* OR telenursing OR telecard\* OR telesurg\* OR teledermato\* OR Telepsychiatr\* OR Teleconsult\* OR Teleradiolog\* OR Telecare\* OR teleecho\* OR Tele-toxico\* OR Teletoxico\* OR telepractice\* OR tele-practice\* OR telediagnos\* OR Telehome-care\* OR teleaudiolog\* OR telepatholog\* OR teleradiotherap\* OR eHealth OR e-health OR mhealth OR m-health OR videoconferencing OR videocommunicat\* OR ((mobile OR It) N2 (health OR solution\*)) OR telesurveil\* OR (remote N2 (monitor\* OR sens\*)) OR telemetr\* OR ((tele\* OR video OR e) N1 (psychiatr\* OR consult\* OR radiolog\* OR health OR monitor\* OR rehabilitation\* OR medic\* OR homecare\* OR nursing OR card\* OR surg\* OR dermat\* OR care\* OR home-care\* OR nursing OR echo\* OR diagnos\* OR audiolog\* OR patholog\* OR radiotherap\* OR surveillan\* OR conferencing OR communicat\* OR metr\* OR physiotherapy\*)) OR Wearable\*)) AND (MH Home Health Care+ OR MH Community Living OR MH Assisted Living+ OR MH Healthy Aging OR TI (home care OR homecare OR telehomecare OR home OR ((independent\* OR assisted OR communit\*) N2 (living)) OR ((healthy OR active) N2 (aging OR ageing)) OR domotic\*) OR AB (home care OR homecare OR telehomecare OR home OR ((independent\* OR assisted OR communit\*) N2 (living)) OR ((healthy OR active) N2 (aging OR ageing)) OR domotic\*)) NOT PT (news OR congres\* OR abstract\* OR book\* OR chapter\* OR dissertation abstract\*).pt. AND LA(English))

**Web of science            913**

TS((((econom\*) NEAR/2 (evaluat\* OR analys\* OR model\*)) OR (cost NEAR/2 (eval\* OR benefit\* OR effectiv\* OR utilit\* OR consequen\* OR minimi\* OR outcome\* OR reduc\* OR saving\* OR efficien\*)) OR (value NEAR/2 money) OR (willingness NEAR/2 pay) OR (business NEAR/2 model\*) OR (social NEAR/2 return NEAR/2 invest\*)) AND ((e-coach\* OR teleHealth OR telemonitor\* OR

Telerehabilitation\* OR Telemedic\* OR Telehomecare\* OR telenursing OR telecard\* OR telesurg\* OR teledermato\* OR Telepsychiatr\* OR Teleconsult\* OR Teleradiolog\* OR Telecare\* OR teleecho\* OR Tele-toxico\* OR Teletoxico\* OR telepractice\* OR tele-practice\* OR telediagnos\* OR Telehome-care\* OR teleaudiolog\* OR telepatholog\* OR teleradiotherap\* OR eHealth OR e-health OR mhealth OR m-health OR videoconferencing OR videocommunicat\* OR ((mobile OR It) NEAR/2 (health OR solution\*)) OR telesurveil\* OR (remote NEAR/2 (monitor\* OR sens\*)) OR telemetr\* OR ((tele\* OR video OR e) NEAR/1 (psychiatr\* OR consult\* OR radiolog\* OR health OR monitor\* OR rehabilitation\* OR medic\* OR homecare\* OR nursing OR card\* OR surg\* OR dermato\* OR care\* OR home-care\* OR nursing OR echo\* OR diagnos\* OR audiolog\* OR patholog\* OR radiotherap\* OR surveillan\* OR conferencing OR communicat\* OR metr\* OR physiotherapy\*)) OR Wearable\*)) AND (("home care" OR homecare OR telehomecare OR home OR ((independent\* OR assisted OR communit\*) NEAR/2 (living)) OR ((healthy OR active) NEAR/2 (aging OR ageing)) OR domotic\*)) AND DT=(article) AND LA=(english)
