# Supplementary material for: eHealth Applications to Support Independent Living of Older Persons: Scoping Review of Costs and Benefits Identified in Economic Evaluations
Source: PubMed Central journal article supplement (PMC7988395; doi:10.2196/24363), 2021-03-09
Supplement: jmir_v23i3e24363_app2.pdf [file jmir_v23i3e24363_app2.pdf]

## APPENDIX 2

Type of eHealth intervention, patient population, country, and analysis type

| <b>Numeric Reference</b> | <b>Publication year</b> | <b>eHealth intervention</b>                                                                                                   | <b>Patient population</b>                              | <b>Country where study was executed</b> | <b>Type of analysis paper reports to have conducted</b>                                                                                  |
|--------------------------|-------------------------|-------------------------------------------------------------------------------------------------------------------------------|--------------------------------------------------------|-----------------------------------------|------------------------------------------------------------------------------------------------------------------------------------------|
| [13]                     | 2017                    | Telehomecare service with health monitoring using biometric sensor technology.                                                | Variety of (chronic) health problems/ chronic diseases | Japan                                   | CBA                                                                                                                                      |
| [20]                     | 2000                    | The telemedicine model used in this study is teleconsulting via video.                                                        | Variety of (chronic) health problems/ chronic diseases | USA                                     | Case study of benefits and savings.                                                                                                      |
| [21]                     | 2017                    | Telepalliative care: virtual visits with members of the team, support for nurses from remote physicians during the visits.    | Variety of (chronic) health problems/ chronic diseases | USA                                     | Impact evaluation on cost and resource utilization.                                                                                      |
| [22]                     | 2005                    | Telehealth monitoring: measuring vital statistics that can be assessed in the next telehealth (video-conferencing) encounter. | Variety of (chronic) health problems/ chronic diseases | USA                                     | Patient selection, costs, projected savings, patient satisfaction, and the technical, clinical, and patient problems with the telehealth |

|      |      |                                                                                                                                                             |                                                        |         |                                                        |
|------|------|-------------------------------------------------------------------------------------------------------------------------------------------------------------|--------------------------------------------------------|---------|--------------------------------------------------------|
|      |      |                                                                                                                                                             |                                                        |         | system are discussed.                                  |
| [23] | 2005 | Telehealth system consisting of a patient unit and clinician unit. Monitoring equipment that measures patient data and transmits it to the nursing station. | Variety of (chronic) health problems/ chronic diseases | USA     | Case study of expenditures and outcomes.               |
| [24] | 2013 | Telehealth = Telemonitoring (transmission of data on vital signs for realtime monitoring) and telephone support.                                            | Variety of (chronic) health problems/ chronic diseases | England | CEA                                                    |
| [25] | 2009 | Telemonitoring, transmission of physiological patient data and assessment by nurse.                                                                         | Variety of (chronic) health problems/ chronic diseases | USA     | CEA                                                    |
| [26] | 2015 | Sensor technology at independent housing facility, in addition to usual care. Sensors assist health status trend monitoring with non-wearables.             | Variety of (chronic) health problems/ chronic diseases | USA     | Cost analysis                                          |
| [27] | 2009 | Assistive technology/adaptive equipment in the patients' homes. Patients' vital signs were remotely monitored.                                              | Variety of (chronic) health problems/ chronic diseases | USA     | CEA                                                    |
| [28] | 2004 | Home telehealth plus nurse case management. Peripheral devices monitored vital signs and out -of-range data triggered electronic alerts.                    | Variety of (chronic) health problems/                  | USA     | Compare outcomes for subjective and objective quality- |

|      |      |                                                                                                                                                                                                                                                                                                                                                         |                                                        |        |                                                                                  |
|------|------|---------------------------------------------------------------------------------------------------------------------------------------------------------------------------------------------------------------------------------------------------------------------------------------------------------------------------------------------------------|--------------------------------------------------------|--------|----------------------------------------------------------------------------------|
|      |      |                                                                                                                                                                                                                                                                                                                                                         | chronic diseases                                       |        | of-life measures, health resource use, and costs.                                |
| [29] | 2013 | Home telemonitoring is the remote transmission (by patients) and collection (by healthcare professionals) of physiological and biological data (such as vital signs and symptoms) and behavioral data (such as compliance with medication and activity level) for the purposes of patient monitoring, data interpretation and clinical decision making. | Variety of (chronic) health problems/ chronic diseases | Canada | Cost-minimization analysis                                                       |
| [30] | 2006 | Home telehealth, two arms: Video group: standard home healthcare plus two virtual visits and internet access. Monitoring group: the same as video group plus home-based physiologic monitoring.                                                                                                                                                         | Variety of (chronic) health problems/ chronic diseases | USA    | Evaluation patient outcomes, costs, and satisfaction.                            |
| [31] | 2000 | Remote video technology (video visits in addition to in-person and telephone visits)                                                                                                                                                                                                                                                                    | Variety of (chronic) health problems/ chronic diseases | USA    | Compare outcomes and cost savings                                                |
| [32] | 2013 | Remote pacemaker in home control service run by nurses with data automatically transmitted.                                                                                                                                                                                                                                                             | Cardiovascular problems                                | Italy  | Comparison of applicability, efficacy, and cost.                                 |
| [33] | 2014 | Telemonitoring, transmission of physiological patient data and assessment by nurse practitioner.                                                                                                                                                                                                                                                        | Cardiovascular problems                                | USA    | Effect identification on medical costs, 30-day rehospitalization, mortality, and |

|      |      |                                                                                                                                                                                                                                                    |                         |             |                                              |
|------|------|----------------------------------------------------------------------------------------------------------------------------------------------------------------------------------------------------------------------------------------------------|-------------------------|-------------|----------------------------------------------|
|      |      |                                                                                                                                                                                                                                                    |                         |             | health-related quality of life.              |
| [34] | 2016 | Telehealth involving in-house monitoring and detection of deterioration and early treatment and intervention upon detection.                                                                                                                       | Cardiovascular problems | USA         | CEA                                          |
| [35] | 2018 | Home telemonitoring, patient data monitored daily and nurse telephone support.                                                                                                                                                                     | Cardiovascular problems | Netherlands | CEA                                          |
| [36] | 2018 | Telerehabilitation program: a 12-week exercise and education intervention. Telerehabilitation is the delivery of rehabilitation services at distance using information and communication technology. Exercise programmes were supervised remotely. | Cardiovascular problems | Australia   | CUA                                          |
| [37] | 2001 | Telecare: virtual home visits by nurses (video technology).                                                                                                                                                                                        | Cardiovascular problems | USA         | Comparison of effectiveness & cost analysis. |
| [38] | 2006 | Home telemonitoring (remote monitoring) after hospital discharge. Patients transmitted monitor readings that were assessed by a nurse.                                                                                                             | Cardiovascular problems | USA         | Outcome comparison                           |
| [39] | 2013 | Home telemonitoring. Patients vital signs transmitted daily to categorize risk profile of patients and potentially triggering action by the nurse.                                                                                                 | Cardiovascular problems | Netherlands | CEA                                          |
| [40] | 2013 | Telehealth: remote delivery or monitoring where healthcare professional deliver services through information and communication technology. Condition                                                                                               | Cardiovascular problems | Canada      | CEA                                          |

|      |      |                                                                                                                                                                         |                         |         |                                                                              |
|------|------|-------------------------------------------------------------------------------------------------------------------------------------------------------------------------|-------------------------|---------|------------------------------------------------------------------------------|
|      |      | management via nursing call center and home monitoring strategy.                                                                                                        |                         |         |                                                                              |
| [41] | 2013 | Telemonitoring: physiological data is electronically transmitted to a healthcare team.                                                                                  | Cardiovascular problems | UK      | CEA                                                                          |
| [42] | 2019 | Home telemonitoring including weekly virtual nursing visits and daily monitoring and transmission of symptoms and vital signs.                                          | Cardiovascular problems | USA     | Outcome comparison between groups relying on an intention-to-treat analysis. |
| [43] | 2013 | Remote monitoring with clinical and technical data transmitted automatically, instant automated alert transmission in case of a prespecified parameter deviation.       | Cardiovascular problems | UK      | Cost-consequence analysis                                                    |
| [44] | 2016 | Online web portal access, online disease management resources.                                                                                                          | Cardiovascular problems | England | CEA                                                                          |
| [45] | 2017 | In-house monitoring. Data collected by the device is transmitted to a central database.                                                                                 | Cardiovascular problems | Italy   | Cost analysis                                                                |
| [46] | 2013 | Home monitoring: mobile transmitter or cardiac messenger. The devices transmit clinical relevant data to the medical center allowing for remote monitoring.             | Cardiovascular problems | Austria | CEA                                                                          |
| [47] | 2017 | Home monitoring: autonomously data transmission from the pacemaker to central service center where the data is evaluated automatically and triggers sent to physicians. | Cardiovascular problems | Germany | Examining safety and efficacy/ effectiveness.                                |
| [48] | 2013 | Biometric sensor technology, televisits, telesurveillance. Real-time transition of biometrics from the patient to the                                                   | Cardiovascular problems | Taiwan  | CEA & clinical impact analysis.                                              |

|      |      |                                                                                                                                                                                                                                                                             |      |         |                            |
|------|------|-----------------------------------------------------------------------------------------------------------------------------------------------------------------------------------------------------------------------------------------------------------------------------|------|---------|----------------------------|
|      |      | healthcare team. Health records were under surveillance by the Telehealth center.                                                                                                                                                                                           |      |         |                            |
| [49] | 2013 | Telemonitoring/remote transition of patient data for patient monitoring and assisting in clinical decision making.                                                                                                                                                          | COPD | Canada  | Cost-minimization analysis |
| [50] | 2017 | Telehealthcare equipment and monitoring by a municipality-based healthcare team. Patient data transmitted electronically and assessed by healthcare professionals.                                                                                                          | COPD | Denmark | CEA                        |
| [51] | 2006 | Telehomecare, also called telemonitoring, remotely monitoring the patient's health status with information and communication technology (Webphone with an integrated touch screen and modem). Nurse reviewed the data and intervened if necessary.                          | COPD | Canada  | Cost-minimization analysis |
| [52] | 2012 | Telerehabilitation; preventive home monitoring concept through self-monitoring, aiding patients to maintain rehabilitation activities in their own home. Using telehomecare technology that involves transmission of patient data and assessed by healthcare professionals. | COPD | Denmark | CUA                        |
| [53] | 2018 | In-house monitoring involving data transmission and assessment by nurses.                                                                                                                                                                                                   | COPD | England | CEA                        |
| [54] | 2017 | Home telemonitoring: vital parameters automatically transmitted, automatic risk assessment and follow up by professionals in case of high exacerbation probability.                                                                                                         | COPD | Germany | CEA                        |
| [55] | 2009 | Tele-assistance programme, possibility of real-time tele-consultation.                                                                                                                                                                                                      | COPD | Italy   | Comparison of end-points.  |

|      |      |                                                                                                                                                                |                                                           |           |                                                            |
|------|------|----------------------------------------------------------------------------------------------------------------------------------------------------------------|-----------------------------------------------------------|-----------|------------------------------------------------------------|
| [56] | 2013 | Telemonitoring, transmission of data, assessment by nurse.                                                                                                     | COPD                                                      | Australia | Outcome comparison                                         |
| [57] | 2018 | Telemonitoring for patients with early discharge from the hospital (home hospitalization). Transmission of physiological patient data and assessment by nurse. | COPD                                                      | Spain     | Evaluation of usefulness & result comparison.              |
| [58] | 2012 | Telerehabilitation: Preventive self-monitoring using a telehealth monitor, data transmission and assessment by healthcare professionals.                       | COPD                                                      | Denmark   | Comparison of costs and hospital admissions.               |
| [59] | 2018 | Telemedicine for follow-up, used for remote consultations to examine, monitor, and care for the patients at home.                                              | Chronic skin problems (chronic wounds/chronic leg ulcers) | France    | CEA                                                        |
| [60] | 2007 | Transmission of digital images to wound care center.                                                                                                           | Chronic skin problems (chronic wounds/chronic leg ulcers) | Austria   | CEA                                                        |
| [61] | 2001 | Telehomecare (video visits in addition to skilled nursing visits), biometric sensor technology.                                                                | Diabetics                                                 | USA       | Cost analysis                                              |
| [62] | 2017 | Home telemonitoring: home-based daily visual field monitoring system to detect changes in vision and triggering alerts.                                        | Age-related macular degeneration                          | USA       | CEA & societal net cost analysis & budget impact analysis. |
| [63] | 2015 | Videoconferencing in telerehabilitation.                                                                                                                       | Post-knee arthroplasty patients                           | Canada    | Cost analysis                                              |

|      |      |                                                                                                                                                                                                                                                                                                                                                                                                                                                                                 |                       |        |                                                             |
|------|------|---------------------------------------------------------------------------------------------------------------------------------------------------------------------------------------------------------------------------------------------------------------------------------------------------------------------------------------------------------------------------------------------------------------------------------------------------------------------------------|-----------------------|--------|-------------------------------------------------------------|
| [64] | 2013 | Virtual visits (web-based video conferencing) by specialty care.                                                                                                                                                                                                                                                                                                                                                                                                                | Parkinson             | USA    | Evaluate feasibility, effectiveness, and economic benefits. |
| [65] | 2006 | Home-based telepalliative care: Recording of vital signs and telecommunication between patient and palliative team.                                                                                                                                                                                                                                                                                                                                                             | Terminal patients     | Japan  | Cost-minimization analysis                                  |
| [66] | 2006 | Telesurveillance: Telephone and wireless emergency call transmitter.                                                                                                                                                                                                                                                                                                                                                                                                            | No specific condition | Canada | Evaluate the effectiveness and costs.                       |
| [67] | 2017 | Fixed and wearable sensors (ambient assisted living technologies).                                                                                                                                                                                                                                                                                                                                                                                                              | No specific condition | USA    | Cost analysis                                               |
| [68] | 2015 | Telemonitoring, transmission of physiological patient data and assessment by nurse practitioner and intervention if needed.                                                                                                                                                                                                                                                                                                                                                     | No specific condition | USA    | Cost analysis                                               |
| [69] | 2005 | Bundled intervention consisting of: multimedia caring programmes, videophone access to professionals, internet access and email services.                                                                                                                                                                                                                                                                                                                                       | No specific condition | Sweden | Cost analysis                                               |
| [70] | 2011 | Devices such as fall sensors, global positioning system, and smoke detectors to enable older persons to live longer in their homes. The devices are connected to a personal computer at the home care providers' offices and then further to the on-call nurse's mobile phone. Each time unusual scores on the devices arise in the home of a patient, the phone alarms the nurse. Second intervention: Video visits imply that the nurse calls the patient via the television. | No specific condition | Norway | CEA                                                         |



|      |      |                                                                                                                                                                                                                            |            |             |               |
|------|------|----------------------------------------------------------------------------------------------------------------------------------------------------------------------------------------------------------------------------|------------|-------------|---------------|
| [71] | 2015 | Online internet-delivered cognitive behavioural therapy program with regular support from a clinical psychologist via secure email system and telephone.                                                                   | Anxiety    | Australia   | CEA           |
| [72] | 2013 | Assistive/sensor technologies. Equipment and sensors installed at home to register patient's behaviour. Information is sent to a server which can be accessed by a formal caregiver to assist in clinical decision-making. | Dementia   | Netherlands | Cost analysis |
| [73] | 2015 | Online disease-management course "Managing your Mood", internet-delivered cognitive behavioural therapy, also including email messaging facilities with a therapist.                                                       | Depression | Australia   | CEA           |
